# Supplementary material for: A multi-technique analysis of gelatin biodegradation on the surface of core–shell nanoparticles by Alteromonas macleodii extracellular proteases
Source: Royal Society of Chemistry journal article supplement (doi:10.1039/d3en00523b), 2023-10-05
Supplement: d3en00523b1.pdf [file d3en00523b1.pdf]

# Supporting Information

for

## **A multi-technique analysis of gelatin biodegradation on core-shell nanoparticles surface by *Alteromonas macleodii* extracellular proteases**

Sergio Fernández-Castillo Suárez<sup>a</sup>, Cécile Courrèges<sup>a</sup>, Javier Jiménez-Lamana<sup>a</sup>, Simon Godin<sup>a</sup>, Sophie Nolivos<sup>a</sup>, Régis Grimaud<sup>a</sup>, Luisa Ronga<sup>a</sup>, Joanna Szpunar<sup>a</sup> and Joachim Allouche<sup>a\*</sup>

<sup>a</sup> *Université de Pau et des Pays de l'Adour, E2S UPPA, CNRS, Institut des Science Analytiques et Physico-chimie pour l'environnement et les matériaux (IPREM), 2 avenue du Président Angot, 64000 Pau.*

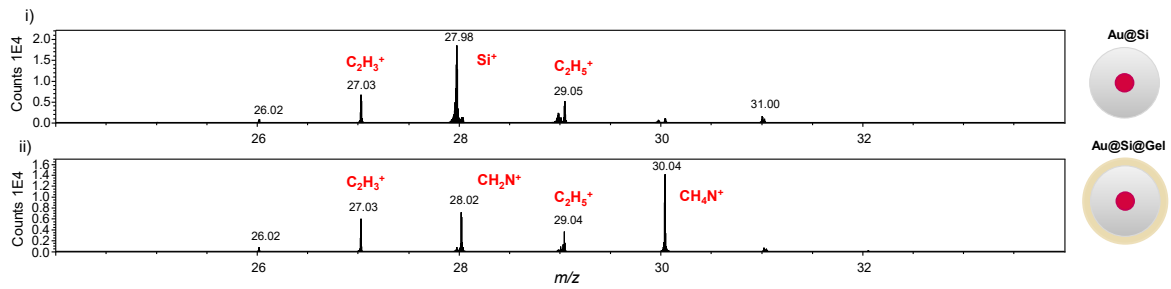

**Figure S1** ToF-SIMS spectra in positive polarity of core-shell nanoparticles before biodegradation for i) Au@Si and ii) Au@Si@Gel, over 24 to 34 m/z range; the characteristic peaks are labelled in red.

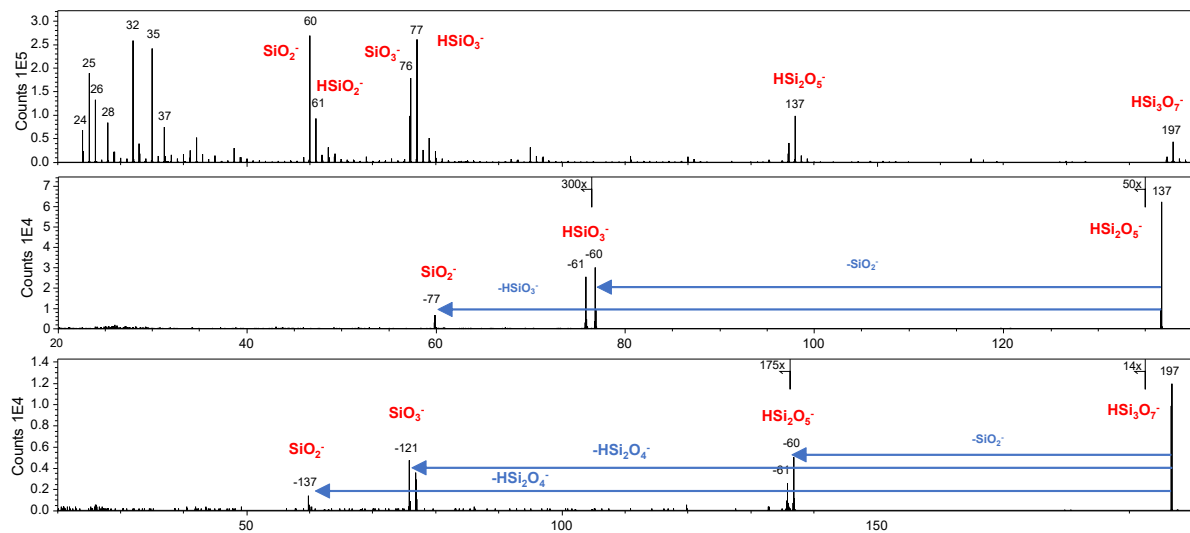

**Figure S2** ToF-SIMS Tandem MS of Au@Si@Gel incubated 60 min in the culture medium. The middle spectrum shows the fragmentation of the precursor ion m/z 136.93, confirmed as HSi<sub>2</sub>O<sub>5</sub><sup>-</sup>. The bottom spectrum shows the fragmentation of the precursor ion m/z 196.9, confirmed as HSi<sub>3</sub>O<sub>7</sub><sup>-</sup>.

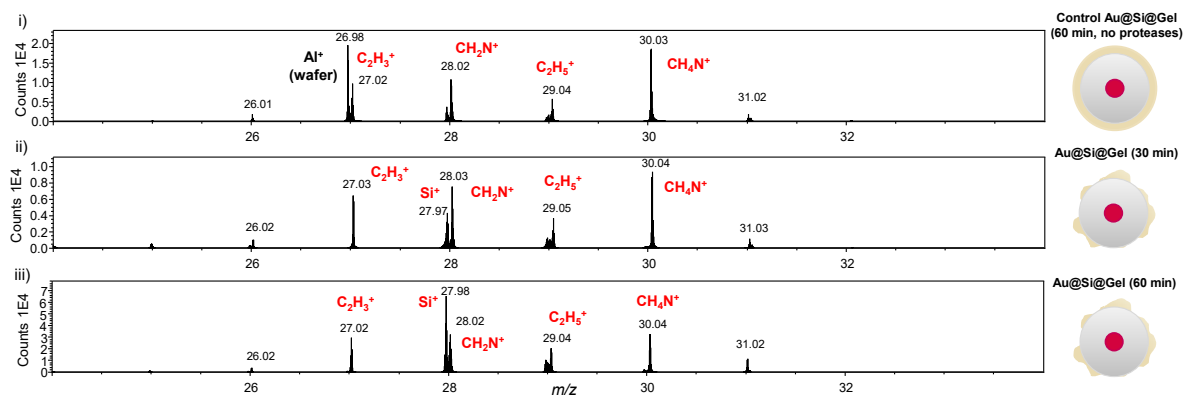

**Figure S3** ToF-SIMS spectra of incubated nanoparticles in the positive polarity. i) control Au@Si@Gel incubated 60 min without proteases, ii) Au@Si@Gel incubated 30 min and iii) Au@Si@Gel incubated 60 min over 24 to 34 m/z range; the characteristic peaks are labelled in red.

**Table S1** XPS quantitative analyses of nanoparticles before and after biodegradation with binding Energies (eV) and atomic percent concentrations (At.%) of a) type A gelatin, b) Au@Si before biodegradation, c) Au@Si@Gel before biodegradation, d) control Au@Si@Gel incubated 60 min without proteases, e) Au@Si@Gel incubated 30 min and f) Au@Si@Gel incubated 60 min.

**a**

| Orbitals | Position | FWHM | At. %        | Assignments                                            |
|----------|----------|------|--------------|--------------------------------------------------------|
| C 1s     | 285      | 1.48 | 30.28        | <b>C-C, C-H</b><br><b>C-O, C-N</b><br><b>O=C-(N,O)</b> |
|          | 286.3    | 1.29 | 18.96        |                                                        |
|          | 288.06   | 1.38 | 16.11        |                                                        |
|          |          |      | <b>65.35</b> |                                                        |
| N 1s     | 398.46   | 1.71 | 1.53         | <b>N=C-NH, N-C</b><br><b>N-C=O</b>                     |
|          | 399.96   | 1.61 | 16.5         |                                                        |
|          |          |      | <b>18.03</b> |                                                        |
|          |          |      |              |                                                        |
| O 1s     | 531.48   | 1.64 | 13.35        | <b>O=C-(N,O)</b><br><b>O-C=O</b>                       |
|          | 532.78   | 1.8  | 3.28         |                                                        |
|          |          |      | <b>16.63</b> |                                                        |
|          |          |      |              |                                                        |

**b**

| Orbitals | Position | FWHM | At. %        | Assignments                            |
|----------|----------|------|--------------|----------------------------------------|
| C 1s     | 285      | 1.6  | 2.77         | <b>C-C</b><br><b>C-O</b><br><b>C=O</b> |
|          | 286.43   | 1.6  | 1.37         |                                        |
|          | 288.57   | 1.6  | 0.6          |                                        |
|          |          |      | <b>4.74</b>  |                                        |
| O 1s     | 532.97   | 1.73 | <b>57.82</b> | <b>O-Si, O-C, O=C</b>                  |
| Si 2p    | 103.65   | 1.77 | <b>37.44</b> | <b>SiO<sub>2</sub></b>                 |

**c**

| Orbitals | Position | FWHM | At. %        | Assignments                                            |
|----------|----------|------|--------------|--------------------------------------------------------|
| C 1s     | 285      | 1.48 | 14.09        | <b>C-C, C-H</b><br><b>C-O, C-N</b><br><b>O=C-(N,O)</b> |
|          | 286.22   | 1.4  | 13.43        |                                                        |
|          | 288.08   | 1.6  | 11.08        |                                                        |
|          |          |      | <b>38.6</b>  |                                                        |
| N 1s     | 398.54   | 1.8  | 0.46         | <b>N=C-NH, N-C</b><br><b>N-C=O</b>                     |
|          | 400.04   | 1.66 | 11.03        |                                                        |
|          |          |      | <b>11.49</b> |                                                        |
|          |          |      |              |                                                        |
| O 1s     | 531.36   | 1.59 | 6.97         | <b>O=C-(N,O)</b><br><b>O-Si, O-C=O</b>                 |
|          | 532.67   | 1.67 | 25.5         |                                                        |
|          |          |      | <b>32.47</b> |                                                        |
|          |          |      |              |                                                        |
| Si 2p    | 103.41   | 1.64 | <b>17.45</b> | <b>SiO<sub>2</sub></b>                                 |

**d**

| Orbitals | Position | FWHM | At. %        | Assignments                                            |
|----------|----------|------|--------------|--------------------------------------------------------|
| C 1s     | 285      | 1.57 | 14.61        | <b>C-C, C-H</b><br><b>C-O, C-N</b><br><b>O=C-(N,O)</b> |
|          | 286.24   | 1.32 | 9.61         |                                                        |
|          | 288.02   | 1.6  | 9.55         |                                                        |
|          |          |      | <b>33.77</b> |                                                        |
| N 1s     | 399.98   | 1.65 | <b>9.32</b>  | <b>N=C-NH, N-C</b><br><b>N-C=O</b>                     |
|          |          |      |              |                                                        |
| O 1s     | 531.22   | 1.8  | 7.44         | <b>O=C-(N,O)</b><br><b>O-Si, O-C=O</b>                 |
|          | 532.57   | 1.73 | 30.17        |                                                        |
|          |          |      | <b>37.61</b> |                                                        |
| Si 2p    | 103.37   | 1.65 | <b>19.29</b> | <b>SiO<sub>2</sub></b>                                 |

**e**

| Orbitals | Position | FWHM | At. %        | Assignments                                            |
|----------|----------|------|--------------|--------------------------------------------------------|
| C 1s     | 285      | 1.6  | 11.54        | <b>C-C, C-H</b><br><b>C-O, C-N</b><br><b>O=C-(N,O)</b> |
|          | 286.28   | 1.26 | 5.87         |                                                        |
|          | 288.06   | 1.47 | 5.71         |                                                        |
|          |          |      | <b>23.12</b> |                                                        |
| N 1s     | 399.96   | 1.61 | <b>6.05</b>  | <b>N=C-NH, N-C</b><br><b>N-C=O</b>                     |
|          |          |      |              |                                                        |
| O 1s     | 531.05   | 1.8  | 6.54         | <b>O=C-(N,O)</b><br><b>O-Si, O-C=O</b>                 |
|          | 532.53   | 1.58 | 38.51        |                                                        |
|          |          |      | <b>45.05</b> |                                                        |
| Si 2p    | 103.26   | 1.6  | <b>25.79</b> | <b>SiO<sub>2</sub></b>                                 |

**f**

| Orbitals | Position | FWHM | At. %        | Assignments                                            |
|----------|----------|------|--------------|--------------------------------------------------------|
| C 1s     | 285      | 1.6  | 4.69         | <b>C-C, C-H</b><br><b>C-O, C-N</b><br><b>O=C-(N,O)</b> |
|          | 286.49   | 1.6  | 3.09         |                                                        |
|          | 288.39   | 1.6  | 1.61         |                                                        |
|          |          |      | <b>9.39</b>  |                                                        |
| N 1s     | 400.04   | 1.92 | <b>1.93</b>  | <b>N=C-NH, N-C</b><br><b>N-C=O</b>                     |
|          |          |      |              |                                                        |
| O 1s     | 531.62   | 1.29 | 2.02         | <b>O=C-(N,O)</b><br><b>O-Si, O-C=O</b>                 |
|          | 532.69   | 1.46 | 52.95        |                                                        |
|          |          |      | <b>54.97</b> |                                                        |
| Si 2p    | 103.37   | 1.61 | <b>33.71</b> | <b>SiO<sub>2</sub></b>                                 |

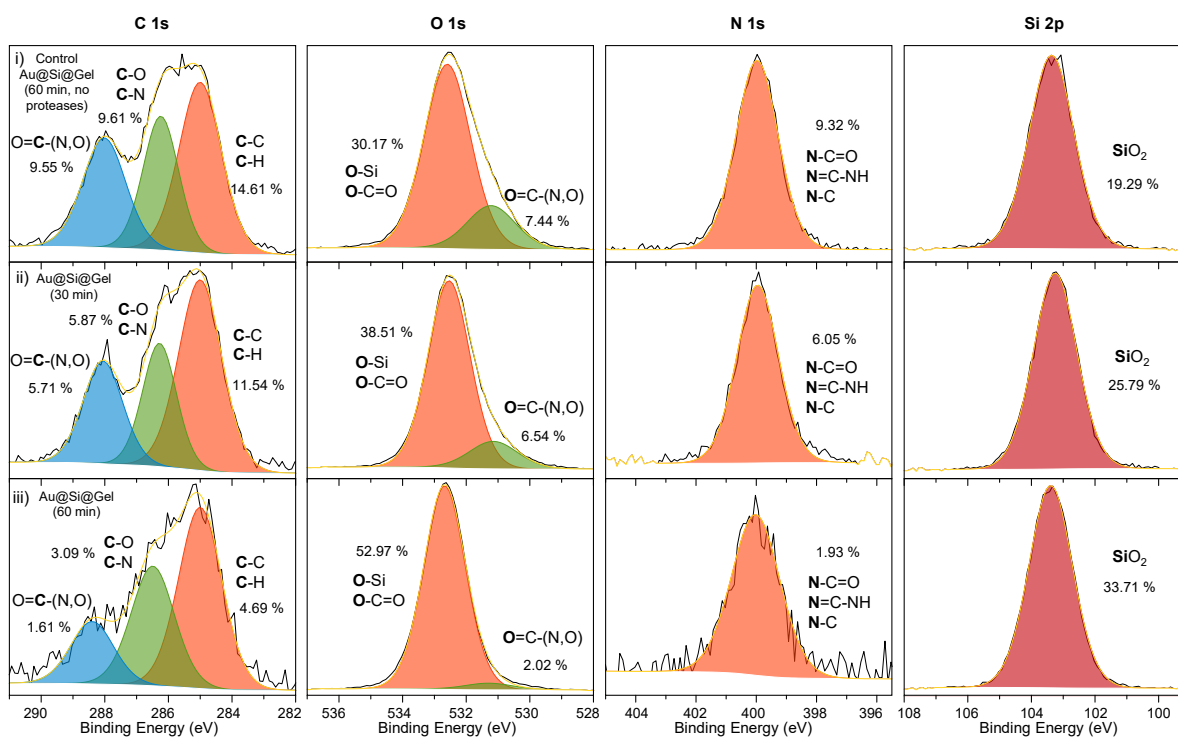

**Figure S4** XPS C 1s, O 1s, N 1s and Si 2p core peaks spectra of i) control Au@Si@Gel incubated 60 min without proteases, ii) Au@Si@Gel incubated 30 min and iii) Au@Si@Gel incubated 60 min with the At.% for all components.

**Table S2** List of peptides de novo sequenced from the MS/MS data from the LC-ESI-MS/MS analysis of the positive gelatin control digested by trypsin. P represents hydroxyproline. N represents deamidated asparagine. M represents oxidized methionine.

| Peptide Sequence         | m/z     | Charge | Accession number | Protein                         | E-value | Identity | PepNovo+ Score |
|--------------------------|---------|--------|------------------|---------------------------------|---------|----------|----------------|
| TGETGASGPPGFAGEK         | 1478.68 | 1      | F1SFA7           | Collagen type I alpha 2 chain   | 4.2E-10 | 100%     | 190.56         |
| GPPGESGAAGPAGPIGSR       | 775.88  | 2      | F1SFA7           | Collagen type I alpha 2 chain   | 5.1E-12 | 100%     | 174            |
| GEPGPAGLPGPPGER          | 1435.68 | 1      | A0A5G2QQE9       | Collagen type I alpha 1 chain   | 2.5E-9  | 100%     | 163.6          |
| GEPGNIGFPGPK             | 1201.58 | 1      | F1SFA7           | Collagen type I alpha 2 chain   | 1E-6    | 100%     | 162.2          |
| GSAGPPGATGFPGAAGR        | 730.35  | 2      | A0A5G2QQE9       | Collagen type I alpha 1 chain   | 3.4E-11 | 100%     | 160.5          |
| GDGGPPGATGFPGAAGR        | 729.34  | 2      | F1SFA7           | Collagen type I alpha 2 chain   | 2.2E-11 | 100%     | 159.11         |
| GPPGESGAAGPAGPIGSR       | 1550.76 | 1      | F1SFA7           | Collagen type I alpha 2 chain   | 5.1E-12 | 100%     | 156.68         |
| GPPGPMGPPGLAGPPGESGR     | 916.93  | 2      | A0A5G2QQE9       | Collagen type I alpha 1 chain   | 5.8E-15 | 100%     | 155.51         |
| TGETGASGPPGFAGEK         | 739.84  | 2      | F1SFA7           | Collagen type I alpha 2 chain   | 4.2E-1  | 100%     | 155.25         |
| GAAGLPGVAGAPGLPGPR       | 1562.83 | 1      | F1SFA7           | Collagen type I alpha 2 chain   | 7.8E-12 | 100%     | 154.88         |
| GETGPAGPAGPVGPVGAR       | 1546.8  | 1      | A0A5G2QQE9       | Collagen type I alpha 1 chain   | 3.6E-12 | 100%     | 154.59         |
| GDGGPPGATGFPGAAGR        | 737.34  | 2      | F1SFA7           | Collagen type I alpha 2 chain   | 2.2E-11 | 100%     | 153.33         |
| GPPGPMGPPGLAGPPGESGR     | 900.94  | 2      | A0A5G2QQE9       | Collagen type I alpha 1 chain   | 5.8E-15 | 100%     | 151.47         |
| GPPGAVGNPVGNGAPGEAGR     | 874.42  | 2      | F1SFA7           | Collagen type I alpha 2 chain   | 2.6E-14 | 100%     | 147.43         |
| GSAGPPGATGFPGAAGR        | 722.35  | 2      | A0A5G2QQE9       | Collagen type I alpha 1 chain   | 3.4E-11 | 100%     | 145.93         |
| GSAGPPGATGFPGAAGR        | 1459.69 | 1      | A0A5G2QQE9       | Collagen type I alpha 1 chain   | 3.4E-11 | 100%     | 145.71         |
| PGADGVAGPK               | 442.73  | 2      | A0A5G2QQE9       | Collagen type I alpha 1 chain   | 6.5E-4  | 100%     | 145.48         |
| PGPAGAAGAPGPQGAAGVGPAGK  | 858.94  | 2      | F1SFA7           | Collagen type I alpha 2 chain   | 3.4E-15 | 100%     | 144.22         |
| GPAGPPGPPGAAGTGLQGMPGER  | 1095.52 | 2      | A0A286ZQ85       | Collagen type III alpha 1 chain | 4.1E-19 | 100%     | 143.13         |
| GFSGLDGAK                | 851.43  | 1      | A0A5G2QQE9       | Collagen type I alpha 2 chain   | 9.6E-3  | 100%     | 142.41         |
| GLPGVAGSVGEPGPL          | 1338.69 | 1      | F1SFA7           | Collagen type I alpha 2 chain   | 9.9E-9  | 100%     | 142.31         |
| PGPAGAAGAPGPQGAAGVGPAGK  | 850.94  | 2      | F1SFA7           | Collagen type I alpha 2 chain   | 3.4E-15 | 100%     | 140.65         |
| TGQPGAVGPAGIR            | 1180.64 | 1      | F1SFA7           | Collagen type I alpha 2 chain   | 2.8E-7  | 100%     | 140.19         |
| GFPGSPGNVGPAGK           | 1273.62 | 1      | F1SFA7           | Collagen type I alpha 2 chain   | 1.9E-8  | 100%     | 138.5          |
| GPAGAPGTPGPQGIAGQR       | 802.91  | 2      | A0A5G2QQE9       | Collagen type I alpha 1 chain   | 1.2E-12 | 100%     | 138.22         |
| GSDGQPGPPGPPGTAGFPGSPGAK | 1085.49 | 2      | A0A286ZQ85       | Collagen type III alpha 1 chain | 4.4E-19 | 100%     | 138.11         |
| GVPGPPGAVGPAGK           | 1192.63 | 1      | A0A5G2QQE9       | Collagen type I alpha 1 chain   | 3.2E-8  | 100%     | 137.48         |
| GPPGPMGPPGLAGPPGESGR     | 908.94  | 2      | A0A5G2QQE9       | Collagen type I alpha 1 chain   | 5.8E-15 | 100%     | 136.92         |
| GEVGPAGPNFAGPAGAAGQP GAK | 1034.49 | 2      | F1SFA7           | Collagen type I alpha 2 chain   | 2.2E-18 | 100%     | 136.74         |
| GFPGSPGNVGPAGK           | 1273.62 | 1      | F1SFA7           | Collagen type I alpha 2 chain   | 1.9E-8  | 100%     | 136.63         |
| TGQPGAVGPAGIR            | 1196.64 | 1      | F1SFA7           | Collagen type I alpha 2 chain   | 2.8E-7  | 100%     | 136.4          |
| PGPPGAVGPAGK             | 518.77  | 2      | A0A5G2QQE9       | Collagen type I alpha 1 chain   | 2.7E-6  | 100%     | 136.07         |
| PGPAGLPGPPGER            | 625.31  | 2      | A0A5G2QQE9       | Collagen type I alpha 1 chain   | 1.8E-7  | 100%     | 136.06         |

| Peptide Sequence           | m/z     | Charge | Accession number | Protein                         | E-value | Identity | PepNovo+ Score |
|----------------------------|---------|--------|------------------|---------------------------------|---------|----------|----------------|
| TGETGASGPPGFAGEK           | 1478.68 | 1      | F1SFA7           | Collagen type I alpha 2 chain   | 4.2E-10 | 100%     | 190.56         |
| GPPGESGAAGPAGPIGSR         | 775.88  | 2      | F1SFA7           | Collagen type I alpha 2 chain   | 5.1E-12 | 100%     | 174            |
| GEPGPAGLPGPPGER            | 1435.68 | 1      | A0A5G2QQE9       | Collagen type I alpha 1 chain   | 2.5E-9  | 100%     | 163.6          |
| GEPGNIGFPGPK               | 1201.58 | 1      | F1SFA7           | Collagen type I alpha 2 chain   | 1E-6    | 100%     | 162.2          |
| GSAGPPGATGFPGAAGR          | 730.35  | 2      | A0A5G2QQE9       | Collagen type I alpha 1 chain   | 3.4E-11 | 100%     | 160.5          |
| GDGGPPGATGFPGAAGR          | 729.34  | 2      | F1SFA7           | Collagen type I alpha 2 chain   | 2.2E-11 | 100%     | 159.11         |
| GPPGESGAAGPAGPIGSR         | 1550.76 | 1      | F1SFA7           | Collagen type I alpha 2 chain   | 5.1E-12 | 100%     | 156.68         |
| GPPGPMGPPGLAGPPGESGR       | 916.93  | 2      | A0A5G2QQE9       | Collagen type I alpha 1 chain   | 5.8E-15 | 100%     | 155.51         |
| TGETGASGPPGFAGEK           | 739.84  | 2      | F1SFA7           | Collagen type I alpha 2 chain   | 4.2E-1  | 100%     | 155.25         |
| GAAGLPVAGAPGLPGPR          | 1562.83 | 1      | F1SFA7           | Collagen type I alpha 2 chain   | 7.8E-12 | 100%     | 154.88         |
| GETGPAGPAGVPVPGAR          | 1546.8  | 1      | A0A5G2QQE9       | Collagen type I alpha 1 chain   | 3.6E-12 | 100%     | 154.59         |
| GDGGPPGATGFPGAAGR          | 737.34  | 2      | F1SFA7           | Collagen type I alpha 2 chain   | 2.2E-11 | 100%     | 153.33         |
| GPPGPMGPPGLAGPPGESGR       | 900.94  | 2      | A0A5G2QQE9       | Collagen type I alpha 1 chain   | 5.8E-15 | 100%     | 151.47         |
| GPPGAVGNPGVNGAPGEAGR       | 874.42  | 2      | F1SFA7           | Collagen type I alpha 2 chain   | 2.6E-14 | 100%     | 147.43         |
| GSAGPPGATGFPGAAGR          | 722.35  | 2      | A0A5G2QQE9       | Collagen type I alpha 1 chain   | 3.4E-11 | 100%     | 145.93         |
| GSAGPPGATGFPGAAGR          | 1459.69 | 1      | A0A5G2QQE9       | Collagen type I alpha 1 chain   | 3.4E-11 | 100%     | 145.71         |
| PGADGVAGPK                 | 442.73  | 2      | A0A5G2QQE9       | Collagen type I alpha 1 chain   | 6.5E-4  | 100%     | 145.48         |
| PGPAGAAGAPGPQGA VGPAGK     | 858.94  | 2      | F1SFA7           | Collagen type I alpha 2 chain   | 3.4E-15 | 100%     | 144.22         |
| GPAGPPGPPGAAGT PGLQGMP GER | 1095.52 | 2      | A0A286ZQ85       | Collagen type III alpha 1 chain | 4.1E-19 | 100%     | 143.13         |
| GFSGLDGAK                  | 851.43  | 1      | A0A5G2QQE9       | Collagen type I alpha 2 chain   | 9.6E-3  | 100%     | 142.41         |
| GLPGVAGSVGEPGPL            | 1338.69 | 1      | F1SFA7           | Collagen type I alpha 2 chain   | 9.9E-9  | 100%     | 142.31         |
| PGPAGAAGAPGPQGA VGPAGK     | 850.94  | 2      | F1SFA7           | Collagen type I alpha 2 chain   | 3.4E-15 | 100%     | 140.65         |
| TGQPGAVGPAGIR              | 1180.64 | 1      | F1SFA7           | Collagen type I alpha 2 chain   | 2.8E-7  | 100%     | 140.19         |
| GFPGSPGNVGPAGK             | 1273.62 | 1      | F1SFA7           | Collagen type I alpha 2 chain   | 1.9E-8  | 100%     | 138.5          |
| GPAGAPGTPGPQGIAGQR         | 802.91  | 2      | A0A5G2QQE9       | Collagen type I alpha 1 chain   | 1.2E-12 | 100%     | 138.22         |
| GSDGQPGPPGPGTAGFP GSP GAK  | 1085.49 | 2      | A0A286ZQ85       | Collagen type III alpha 1 chain | 4.4E-19 | 100%     | 138.11         |
| GVPGPPGAVGPAGK             | 1192.63 | 1      | A0A5G2QQE9       | Collagen type I alpha 1 chain   | 3.2E-8  | 100%     | 137.48         |
| GPPGPMGPPGLAGPPGESGR       | 908.94  | 2      | A0A5G2QQE9       | Collagen type I alpha 1 chain   | 5.8E-15 | 100%     | 136.92         |
| GEVGPAGPNGFAGPAGAAGQP GAK  | 1034.49 | 2      | F1SFA7           | Collagen type I alpha 2 chain   | 2.2E-18 | 100%     | 136.74         |
| GFPGSPGNVGPAGK             | 1273.62 | 1      | F1SFA7           | Collagen type I alpha 2 chain   | 1.9E-8  | 100%     | 136.63         |
| TGQPGAVGPAGIR              | 1196.64 | 1      | F1SFA7           | Collagen type I alpha 2 chain   | 2.8E-7  | 100%     | 136.4          |
| PGPPGAVGPAGK               | 518.77  | 2      | A0A5G2QQE9       | Collagen type I alpha 1 chain   | 2.7E-6  | 100%     | 136.07         |
| PGPAGLPGPPGER              | 625.31  | 2      | A0A5G2QQE9       | Collagen type I alpha 1 chain   | 1.8E-7  | 100%     | 136.06         |

**Table S3** List of peptides de novo sequenced from the MS/MS data from the LC-ESI-MS/MS analysis of the supernatant of Au@Si@Gel nanoparticles incubated in the culture medium for 60 minutes. P represents hydroxyproline.

| Peptide Sequence       | m/z     | Charge | Accession number | Protein                       | E-value | Identity | PepNovo+ Score |
|------------------------|---------|--------|------------------|-------------------------------|---------|----------|----------------|
| GVQGGKGEQGPAGPPGFQ     | 842.41  | 2      | F1SFA7           | Collagen type I alpha 2 chain | 6.4E-13 | 100%     | 115.17         |
| GAPGTAGPSGSPGLPGERGAA  | 890.43  | 2      | F1SFA7           | Collagen type I alpha 2 chain | 8.4E-15 | 100%     | 113.52         |
| DFGYEGDFYR             | 634.76  | 2      | F1SFA7           | Collagen type I alpha 2 chain | 3.6E-5  | 100%     | 106.52         |
| GISGPPGPPGPA           | 1035.51 | 1      | F1SFA7           | Collagen type I alpha 2 chain | 2E-6    | 100%     | 101.6          |
| GKEGPAGLPGID           | 563.79  | 2      | F1SFA7           | Collagen type I alpha 2 chain | 5.3E-6  | 100%     | 94.53          |
| PGLPGPR                | 363.2   | 2      | F1SFA7           | Collagen type I alpha 2 chain | 5E-1    | 100%     | 93.86          |
| GSVGEPPGL              | 828.41  | 1      | F1SFA7           | Collagen type I alpha 2 chain | 1.1E-2  | 100%     | 89.04          |
| GAPGTAGPSGSPGLPGERGAA  | 898.43  | 2      | F1SFA7           | Collagen type I alpha 2 chain | 8.4E-15 | 100%     | 88.99          |
| GEVGSAGPPGPPGLR        | 690.35  | 2      | F1SFA7           | Collagen type I alpha 2 chain | 3.8E-9  | 100%     | 86.13          |
| GYEGDFYR               | 503.72  | 2      | F1SFA7           | Collagen type I alpha 2 chain | 9.6E-3  | 100%     | 82.03          |
| GILGAPGFL              | 860.49  | 1      | F1SFA7           | Collagen type I alpha 2 chain | 8.3E-3  | 100%     | 77.88          |
| GPSGSPGLPGERGAA        | 663.33  | 2      | F1SFA7           | Collagen type I alpha 2 chain | 8.2E-9  | 100%     | 77.31          |
| GLMGPRGPPGAVGAPGPQ     | 824.42  | 2      | F1SFA7           | Collagen type I alpha 2 chain | 7.3E-13 | 100%     | 76.24          |
| DFGYEGDF               | 949.36  | 1      | F1SFA7           | Collagen type I alpha 2 chain | 1.5E-2  | 100%     | 75.06          |
| GLTGSPGSPGPDGKTGPFGPA  | 926.44  | 2      | A0A5G2QQE9       | Collagen type I alpha 1 chain | 1.8E-15 | 100%     | 73.48          |
| GFPGSPGNVGPA           | 544.75  | 2      | F1SFA7           | Collagen type I alpha 2 chain | 2E-6    | 100%     | 71.55          |
| GANGDRGEAGPAGPAGPAGPR  | 611.3   | 3      | F1SFA7           | Collagen type I alpha 2 chain | 3.4E-15 | 100%     | 69.91          |
| GAPGLPGPR              | 853.45  | 1      | F1SFA7           | Collagen type I alpha 2 chain | 5.1E-3  | 100%     | 69.45          |
| GPTGPPGPIGSVGAPGPK     | 779.91  | 2      | A0A5G2QQE9       | Collagen type I alpha 1 chain | 1.2E-12 | 100%     | 68.68          |
| GEVGLPGVS              | 830.43  | 1      | F1SFA7           | Collagen type I alpha 2 chain | 1.5E-2  | 100%     | 66.57          |
| GDQGPVGRGTGETGASGPPGFA | 965.95  | 2      | F1SFA7           | Collagen type I alpha 2 chain | 1.4E-15 | 100%     | 66.45          |
| GAAGATGARGL            | 451.25  | 2      | F1SFA7           | Collagen type I alpha 2 chain | 1.9E-4  | 100%     | 65.34          |
| DFGYEGDFY              | 1112.42 | 1      | F1SFA7           | Collagen type I alpha 2 chain | 5.7E-4  | 100%     | 63.44          |
| GPRGFPGSPGNVGPA        | 699.84  | 2      | F1SFA7           | Collagen type I alpha 2 chain | 1.1E-9  | 100%     | 62.48          |
| GAAGLPGVA              | 728.39  | 1      | F1SFA7           | Collagen type I alpha 2 chain | 2.2E-2  | 100%     | 60.98          |
| GGGYDFGYE              | 964.37  | 1      | F1SFA7           | Collagen type I alpha 2 chain | 1.3E-3  | 100%     | 59.99          |

**Table S4** List of peptides de novo sequenced from the MS/MS data from the LC-ESI-MS/MS analysis of the supernatant of Au@Si@Gel nanoparticles incubated in the culture medium for 30 minutes. P represents hydroxyproline.

| Peptide Sequence       | m/z     | Charge | Accession number | Protein                       | E-value | Identity | PepNovo+ Score |
|------------------------|---------|--------|------------------|-------------------------------|---------|----------|----------------|
| GAPGTAGPSGSPGLPGERGAA  | 890.43  | 2      | F1SFA7           | Collagen type I alpha 2 chain | 8.4E-15 | 100%     | 124.67         |
| GVQGGKGEQGPAGPPGFQ     | 842.41  | 2      | F1SFA7           | Collagen type I alpha 2 chain | 6.4E-13 | 100%     | 119.25         |
| DFGYEGDFYR             | 634.76  | 2      | F1SFA7           | Collagen type I alpha 2 chain | 3.6E-5  | 100%     | 119.20         |
| GISGPPGPPGPA           | 1035.51 | 1      | F1SFA7           | Collagen type I alpha 2 chain | 2E-6    | 100%     | 93.61          |
| GSVGEPPGL              | 828.41  | 1      | F1SFA7           | Collagen type I alpha 2 chain | 1.1E-2  | 100%     | 99.13          |
| PGLPGPR                | 363.2   | 2      | F1SFA7           | Collagen type I alpha 2 chain | 5E-1    | 100%     | 92.95          |
| GYEGDFYR               | 503.72  | 2      | F1SFA7           | Collagen type I alpha 2 chain | 9E-3    | 100%     | 91.53          |
| GKEGPAGLPID            | 563.79  | 2      | F1SFA7           | Collagen type I alpha 2 chain | 5.3E-6  | 100%     | 87.35          |
| GAAGATGARGL            | 451.25  | 2      | F1SFA7           | Collagen type I alpha 2 chain | 1.9E-4  | 100%     | 85.80          |
| GPSGSPGLPGERGAA        | 663.33  | 2      | F1SFA7           | Collagen type I alpha 2 chain | 8.2E-9  | 100%     | 83.44          |
| GGGYDFGYE              | 964.37  | 1      | F1SFA7           | Collagen type I alpha 2 chain | 1.3E-3  | 100%     | 79.08          |
| GEQGPAGPPGFQ           | 579.26  | 2      | F1SFA7           | Collagen type I alpha 2 chain | 1E-6    | 100%     | 76.53          |
| GLTGSPGSPGPDGKTGPPGPA  | 926.44  | 2      | A0A5G2QQE9       | Collagen type I alpha 1 chain | 1.8E-15 | 100%     | 76.30          |
| GLMGRPPGAVGAPGPQ       | 824.42  | 2      | F1SFA7           | Collagen type I alpha 2 chain | 7.3E-13 | 100%     | 72.24          |
| GPSGSPGLPGERGAA        | 655.33  | 2      | F1SFA7           | Collagen type I alpha 2 chain | 8.2E-9  | 100%     | 71.76          |
| GGGYDFGY               | 835.33  | 1      | F1SFA7           | Collagen type I alpha 2 chain | 1.4E-2  | 100%     | 61.16          |
| GEVGSAGPPGPPGLR        | 690.35  | 2      | F1SFA7           | Collagen type I alpha 2 chain | 3.8E-9  | 100%     | 71.22          |
| GILGAPGFL              | 860.49  | 1      | F1SFA7           | Collagen type I alpha 2 chain | 8.3E-3  | 100%     | 70.96          |
| DFGYEGDF               | 949.36  | 1      | F1SFA7           | Collagen type I alpha 2 chain | 1.5E-2  | 100%     | 70.92          |
| GDQGPVGRGTGETGASGPPGFA | 965.95  | 2      | F1SFA7           | Collagen type I alpha 2 chain | 1.4E-15 | 100%     | 68.36          |
| AGPPGPPGLR             | 475.76  | 2      | F1SFA7           | Collagen type I alpha 2 chain | 3.2E-4  | 100%     | 68.25          |
| DFGYEGDFY              | 1112.42 | 1      | F1SFA7           | Collagen type I alpha 2 chain | 5.7E-4  | 100%     | 62.98          |
| GEVGLPGVS              | 830.43  | 1      | F1SFA7           | Collagen type I alpha 2 chain | 1.5E-2  | 100%     | 59.85          |



**F1SFA7\_PIG - Collagen type I alpha 2 chain. Coverage 305/1365 → 22.34 %**

MLSFVDTRLLLLAVTSLATCQSLQEATARKGPTGDRGRPRGERGPPGPPGRDGDGIPGPPGPPGPPGPPGLGNNFAAQYDGGKGVG  
AGPGMGLMGRPPGAVGAPGQGFQGPAGEPEGPGQTGPAGARGPPGPPGKAGEDGHPGKPRPGERGVVGPQGARGFPPT  
GLPGFKGIRGHNLGLDGLKQPGAPVKGEPGAPGENGTGQTGARGLPGERGRVGPAGARGNDGVSVPVGPAGPIGSAGPPGF  
PGAPGPKGELGPVGNPAGPAGPRGEVGLPGVSGPVGPPGNPGANLPGAKGAAGLPGVAGAPLPGPRGIPGPAAGAATGARG  
LVGEPGAGSKGESGKGEPPGAAGPQPPGPSGEEGKRGNPEVGSAGPPGPPGLGNPGRSLPGADGRAGVMGPPGSRGPTG  
PAGVVRGPNDSGRPEPEGLMGRGFPSPGNVGPAGKEGPAAGLPGIDGRPGPIGPAGARGEPGNIGFPPGKGTGDPGKNGEKGHA  
GLAGARCAPGPDGNGAQQPPGQGVQGGKEQGPAGPPGFQGLPGPAGTAGEVGVKPGERGIPEFGLPGPAGPRGERGPPGES  
GAAGPAGPIGSRGPSPPGPDGNKGEVGLGAPGTAGPSGSPGLPGERGAAGIPGGKGEKGETGLRGDVGSPGRDARGAPAVGA  
PGPAGANGDRGEAGPAGPAGPRGSPGERGEVGPAGPNFAGPAGAAGQPGAKGERGKPKGENGPVGTGPVGAAGPAGP  
NGPPGAGSRGDDGGPPGATGFPGAAGRIGPPGPSISGPPGPPGAGKEGLRGRDQGPVGRITGASGPPGFAGEKGPSGEP  
GTAGPPGTPGPGQILGAPGFLGLPGSRGERCLPGVAGSVGEPGLGIAGPPGARPPGAVGNPVGNGAGEAGRDGNPDSGPPGR  
DQAGHKGERGYPGNPPGAGAAGAPGQGA/GPAGKHGNGEPGAGSVGPAGAVGFRGPSGPGQIRGEKGEKGDGPRGLPL  
KGHNLQGLPLAGHHDQAGPVPVGPAGPRGPAGSPGAGKDGRTGQPGAVGPAIGRGSQGSQGPAGPPGPPGPPGPPGSGG  
GYDFGYEGDFYRADQPRSPSLRPKDYEVDA TLKSLNNQIETLLTEPSRKNPARTCRDLRLSHPEWSSGYWIDPNQGCMTDAIKVYC  
DFSTGETCIRQPENIPAKNWRNSKVKKHWLGETINGGTQFEYNMEGVTTKEMATQLAFMRLLANHASQNTIYHCKNSIAYMDEETGN  
LKKAVILQGSNDVELVAEGNSRFTYTVLVDGCSKKTNEWRTIIEYKTNKPSRLPILDIAPLDIGDADQEVSDVGVPCFK

**A0A5G2QE9\_PIG - Collagen type I alpha 1 chain. Coverage 219/1451 → 15.09 %**

MFSFVDRLLLLAATALLTHGQEEGQEEGQQGQEEIPPVTCVQNGRLYHDRDWWKPVPCQICVCDNGNVLCDDDVICDEIKNCPSARV  
PAGECCPVCPEGEVSPDQETTGVGPKGDTGPRGPRGSPGPPGRDGPQGLPGLPGLPGLPGLGNNFAPQLSYGYDEKSA  
GISVPGMGPSPGRGLPGLPAGPQGFQGPGEPEGASGPMGPRGPPGPPGKNGDDGEAGKGRPGERGPPGQARGPLP  
TAGLPGMKGHRGFSCLDGAAGDAGAPAGPKGEPGSPGANGAGQMGPRGLPGERGRPPGPAAGTGPAGPPGAVGAKGEAG  
PQARGSEGPQGVREGEPPGPAAGPAGNPAGDQPGGKANGAPGIAGAPGFPGARGPSGPPGPPGPKGNSGEPGAPG  
SKGDTGAKGEPGPTGVQPPGPAEEGKRGARPEGPAGLPGPPGERGGPGSRGFPGADGVAGPKGPAGERGSPGAPGKSGP  
EAGRPGEAGLPGAKLGTSPGSPGDKTGPPGAGQDGRPPGPPGARQOAGVMGFPGPKGAAGEPGKAGERGVPGPPGAVG  
PAGKDGEAGAQQPPGAPGAGERGEQGPAGSPGFQGLPGPAGPPGEAGKPGEQGVGDLGAPGSPGARGERGFGERGVQGGPP  
PAGPRGANGAPNDGAKGDAGAPGAGSQGAPLQGMGERGAAGLPGPKGDRGDAGPKGADGAPKDGVRGLTGPVPPGPA  
PGDKGETGPSGAPGTARGAPDRGEPGPPGPAFAGPPGADGQPGAKGEPGDAGAKGDAGPPGAPGTGPPGPIGSVGPAGPK  
GARBSAGPPGATGPPGAAGRVPPPGPSNAGPPGPPGAGKEGSKGRPETGPAGRPGEAGPPGPPGAGEKSGPADGPAGAP  
GTPGPGQIAGQGVVGLPQGRGERGFPGLGSPGEPGKQSPGSPGERGPPGPMGPPGLAGPPGESGRGEGAPGAEKSPGRDGP  
GKGDREGSEGPAGPPGAPGAPGVPVGPAGKSGDRGETGPAGPAGVGPVGPARGPAGPQGRDGETGEQDGRGKHRGFS  
GLQGGPPGPPGSPGEGQPSGASGAPGPPGPPGSAGAPGKDG LNLGPIGPPGPRGRTGDAGVPVPPGPPGPPGPPGPPSGGDFD  
FLPQPPQEKAHDGGRYRADDANVVRDRDLEVDTLKSLSQIENIRSPGSRKNPARTCRDLKMSHSDWKSGEYWIDPNQGCNLD  
KVFCNMETGETCVYPTQPSVPPQKNWYISKNPDKRHWYGESMTDGFQFEYGGESDPADVAIQLTFLRLMSTEASQNTIYHCKNSVA  
YMDQQTGNLKKALLQGSNEIIRAEGNSRFTYSVIYDGTSTHTGAWGKTVEYKTTKTSRLPIIDVAPLDVGPADQEFIDLSPVCF

**A0A286ZQ85\_PIG - Collagen type III alpha 1 chain. Coverage 135/1467 → 9.20 %**

DMTSFVQKGTWLLFALLHPTVILAQQQEAIEGGCSHLGQSYADRDVWKPEPCQICVCDSGSVLCDDDIICDDQELDCPNPEIPFGECCAVC  
PQPPTATPRPPNGHGPQPKGDPGPPGIPGRNDPGLPGQPGSPGSPGPPGICESCPTGGQNYSPQYESYDVKAGVAGGGIGGYPG  
PAGPPGPPGPPGVSGHPGAPGSPGYQPPGEPGQAGPAGPPGPPGAIGPSGPAKDGESGRPGRGERGLPGPPGLGAPAMPGF  
PGMKGHRGFDGRNGEKDGTGAPGLKGENLPGENGAPGPMGPRGAPGERGRPLGAAGARGNDGARSSDQGPFPGPPGPTAGF  
PGSPGAKGEVGPAGSPGSPGQQRGEPGQGHAGAAAGPPGPPGNSGSPGGKEMGPAGIPGAPGLMGARGPPGPPGTNAGAPGQ  
RGAAGEPGKNGAKGEPGRGERGEAGSPGIPGPKGEDGKDGSPGEPGANGLPGAAGERGMPPGFRGAPGANGLPGEKGPAGERGGP  
GPAGPRVAGEPGRDGVPPGGLRGMPPGSPGSDGKPPGSPGQGESGRPPGSPGPRGQGVMGFPGPKNGDAPGKNGE  
RGGPGGGLPGLPGLNGETGPQPPGPTGPGDKGDTGPPGQQLQGLPGTSGPPGENGKPGEPGPKGEAGAPGIPGKGDGSA  
PGERGPPGAVGSPGPRGAGPPGPEGGKGPAGPPGPPGAAGTGLQGMPPGERGSSGSPGPKGDKGDPGSGADGAPKDGPRG  
PTGPIGPPGAPQPDKGESGAPGLPIAGPRGGGERGEHPPGAPGFPAGPQNGEPGAKGERGAPGKGGGPPGIAGQPPGTT  
GPPGPPGPPGQVKGERSPPGGGAAGFPGGRLPGPPGNSNGNPPGSSGPPGKDGPPGPPGSSGAPGSPVSGPKGDAGQPGEK  
GSPGPPGPPGAPGPGISGITGARLAGPPGMPGARGSPGQGVKGENKPPGSLNGERGPPGQGLPLGAGAAGEPGRDGNP  
SDGLPGRDGPAGSKDRGENSPGAPGAPGHPGPPGVPVGPAGKNGDRGETGPAGPAGAPGAGSRGAPGQGRGDKGETGERG  
ANGIKGHRGFPGNPAGSPGAGHQQAVGSPGAPGRPVGSPGPPGKDGASGHPGPIGPPGPRGNGRGERGSESPGHPGQPP  
PGPPGAPGCCGGAAAIAGVGEKAGGFAPYYGDEPMDFKINTDEIMTSLKSVNGQIESLISPDGSRKNPARNCRDLKFCHEPKSGE  
YVVDPNQGCMDAIKVFNCNMETGETCISASPSTVPRKNWWTDSGAEKYYVWFGESMNGGFQFSYGNPELPEVDLVDQLAFLRLSSR  
ASQNTIYHCKNSIAYMEHASGNVKKALRLMGSNEGEFKAEGNSKFTYTVLEDGCTKHTGEWVKTVFEYRTRKAVRLPIVDIAPYDGGPD  
QEFADIGPVCFL

**Figure S5** Protein coverage of the three proteins found in the positive trypsin-digested gelatin control. The identified peptides for Collagen type I alpha 2 chain protein had a 22.34 % protein coverage, for Collagen type I alpha 1 chain had a 15.09 % coverage and for Collagen type III alpha 1 chain had a 9.20 % coverage.

**F1SFA7\_PIG - Collagen type I alpha 2 chain. Coverage 223/1365 → 16.34 %**

MLSFVDTRLLLLAVTSLCATCQSLQEATARKGPTGDRGRPRGERGPPGPPGRDGDGIPGPPGPPGPPGPPGLGGNFAAQYDGKGV  
GAGPGPMGLMCPRGPPGAVGAPGPGFQGPAGEPEGEPGQTGPAGARGPPGPKAGEDGHPGKPRGERGVVGPQGARGFP  
GTPGLPGFKIRGHNLGLDGLKGGPAGPVKGEPAENGTPGQTGARGLPGERGRVAGPAGARGNDGSGVGPVGPAGPIGSA  
GPPGFPGAPGPKGELGPVGNPAGPAGPRGEVGLPGVS  
GPVGPNGPANGPLGAKGAAGLPGVAGAPGLGPR  
GIPGPA  
GAAGATGARGLVGEPPAGSKGESGKGEPAAGPQGGPPGSGEEGRGN  
GEVGSAGPPGPPGLR  
GNPGRSLPGADGRAGVMGP  
PGSRGPTGPAVGRPNNGDSGRPGEPGLM  
GPRGFPGSPGNVGPAGKEGAPGLPGID  
GRPGPIGPAGARGEPGNIGFPGPKGPTGDP  
GKNGEKGHAGLAGARGAPDPGNNGAQGGPPGQ  
VQGGKGEQGPAGPPGFQ  
GLPGPAGTAGEVGPGERGIPGEFGLPGPAGP  
RGERGPPGESGAAGPAGPIGSRGSPGPPGPDGNKGEVGLGAPGTAGPSGSPGLPGERGAA  
GIPGGKGEKGETGLRGDVGSPGR  
DGARGAPAVGAPGA  
GANGDRGEAGPAGPAGPR  
GSPGERGEVGPAGPNGFAGPAGAAGQPAGKGERGTKGPKGENGPVG  
PTGPVGAAGPAGPNGPPGAGSRGDGPPGATGFPGAAGRIGPPGSPGISGPPGPPGAGKEGLRGR  
GDQGPVGRGTGETGASC  
PPGFA  
GKGPSEPGTAGPPGTPGPO  
GILGAPGFL  
GLPGSRGERGLPGVA  
GSVGEPPGL  
GIAGPPGARGPPGAVGNPVGNGAPGE  
AGRDGNPDSGPPGRDQAGHKGERGYPGNPAGAAAGPQGAAGVGPAGKHGNGRGEPPAGSVGPAGAVGPRGSPGQIR  
GEKGEVGDGKPRGLPGLKGHNLQGLPGLAGHHGDQAGPVPVGPAGPRGAPSPGAGKDGRTGQPAVGPAGIRGSQGSQGP  
AGPPGPPGPPGPPGSP  
CGGYDFGYEGDFYR  
ADQPRSPSLRPKYEV DATLTKSLNNQIETLLTPEGSRKNPARTCRDLRLSHPEWS  
SGYYWIDPNQCTMDAIVYCDFSTGETCIRQENIPAKNWRNSKVKKHVWLGETINGGTQFEYNMEGVTTKEMATQLAFMRLLAN  
HASQNITYHCKNSIAYMDEETGNLKKAVILQGSNDVELVAEGNSRFTYTVLVDGCSKKTNEWKRKTIIYKTNKPSRLPILDIAPLDIGDAD  
QEVSVDPVPCFK

**A0A5G2QQE9\_PIG - Collagen type I alpha 1 chain. Coverage 39/1451 → 2.69 %**

MFSFVDRLLLLLAATALLTHGQEEGQEEGQQQEEEDIPPVTCVQNGLRYHHRDWWKPVPCQICVCDNGNVLCDDDVICDEIKNCPARS  
VPAGECCPVCPEGEVSPTDQETTGVGPKGDTGPRGPRGSPGPPGRDGIQGPGLGPPGPPGPPGPPGLGGNFAPQLSYGYDEK  
SAGISVPGPMGSPGRGLPGPPGAPGQGFQGGPEGEPGASGPMGPRGPPGPKNGDDGEAGKPRGERGPPGQGARG  
LPGTAGLPGMKGHRGFSGLDGAKGDAGAPGKGEPSGGENGAPGQMGPRGLPGERGRGPPGAPGTPAGPPGFPAGVGA  
GEAGPQARGSEGPQVRGEPGPPGAGAAGPAGNPAGDQGGKANGAPGAPGFPGARGPSGQGPSGPPGPKGNSGE  
PGAPGSKGDTGAKGEPGPTGVQGGPAGEEKRGARGEPGAGLPGPPGERGGPGSRGFPGADGVAAGPKGAGERGSPGAP  
PKGSPGEAGRPEAGLPGAK  
GLTGSPGSPGPDGKTGPPGPA  
GQDGRGPPGPPGARGQAGVMGFPGKGAAGEPGKAGERGVP  
GPPGAVGPAGKDGEAGAQQPPGAPAGERGEQGPAGSPGFQGLPGPAGPPGEAGKPEQGVPGDLGAPGSPGARGERGFPGE  
RGVQGGPPGAPPRGANGAPNDGAKGDAGAPGAPGAPGLQGMGERGAAGLPGPKGDRGDAGPKGADGAPKDGVRGLT  
GPIGPPGAPAGPDKGETGSPGAPGPTGARGAPDRGEPGPPGAPGAGPPGADGQPGAKGEPGDAGAKGDAGPPGPA  
GPTGFP  
GPIGSPVAGP  
GARGSAGPPGATGFPGAAGRVP  
GPPGSPGNAGPPGPPGAPGKEGSKGPRGETGPAGRPG  
EAGPPGPPGAPGK  
GSPGADGAPAGP  
GTPGQGIAGQRGVVGLPGQRGERGFPLPGSPGEPGKQGPSGSPGERGPPGPMGPPGLAGPPGESGREGA  
PGAEGSPGRD  
GAPGKDRGESGAPPPGAPGAPGAPGVPAGKSGDRGETGPAGPAGVGPVGARFAGPQGPGRGDKGETG  
EQGDRGK  
GHRGFSGLQGGPPGSPGEGQGPSGASGAPGPRGPPGSAAGPKDGLNGLPGPIGPPGPRGRTGDAGPVGPPGPPG  
PPGPPGPPSGGDFD  
SFLPQPPQEK  
AHDGGRYRADDANVVRDRDLEVD  
TTLKSLSQIENIR  
SPEGSRKNPARTCRDLK  
MCHSDWK  
SGEY  
WIDPNQGNLDAIKVFCN  
METGETCVYPTQPSVPK  
NWIYISK  
NPKDKRHVVYGES  
MTDGFQFEYGGEGSD  
PADVAIQLTFLRL  
MSTEASQNITYHCKNSVAYMDQQTGNLKKALLLQGSNEIEIRAEGNSRFTYSVIYDGTSTHTGAWGKTIVIEYKTTKTSRLPIIDVAPLDV  
GAPDQEFIDLSPVCF

**Figure S6** Protein coverage of the two proteins found in the supernatant of Au@Si@Gel nanoparticles incubated in culture medium for 60 min. The identified peptides for Collagen type I alpha 2 chain protein had a 16.34 % coverage and for Collagen type I alpha 1 chain had a 2.69 % coverage. Peptides corresponding to Collagen type III alpha 1 chain were not found in this sample.
